# Supplementary material for: New species of Ontocetus (Pinnipedia: Odobenidae) from the Lower Pleistocene of the North Atlantic shows similar feeding adaptation independent to the extant walrus (Odobenus rosmarus)
Source: PeerJ journal article supplement (doi:10.7717/peerj.17666), 2024-08-13

A

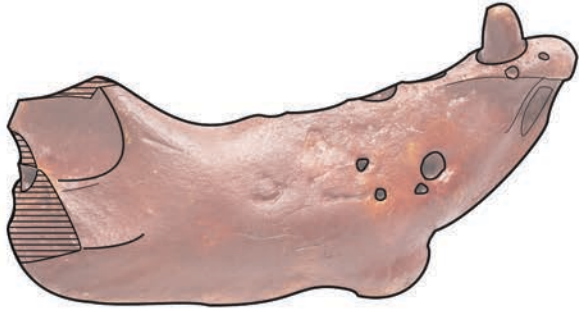

B

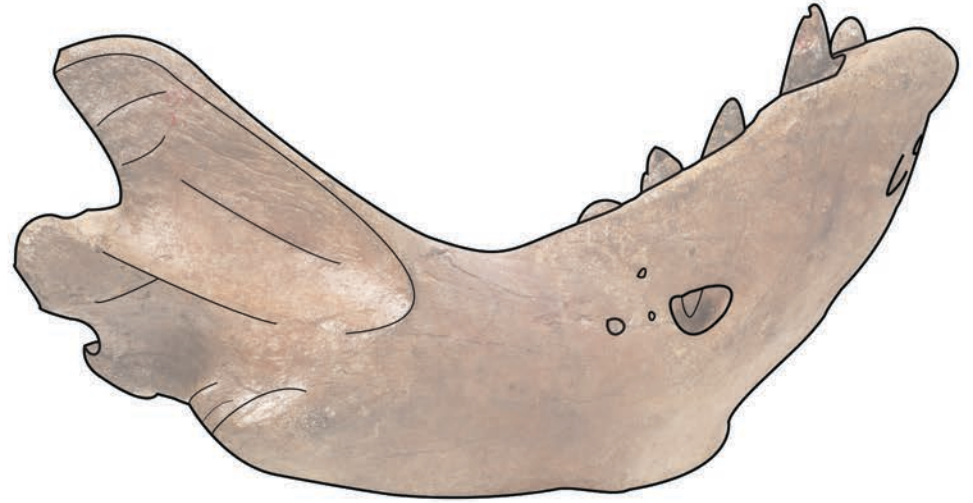

5 cm

C

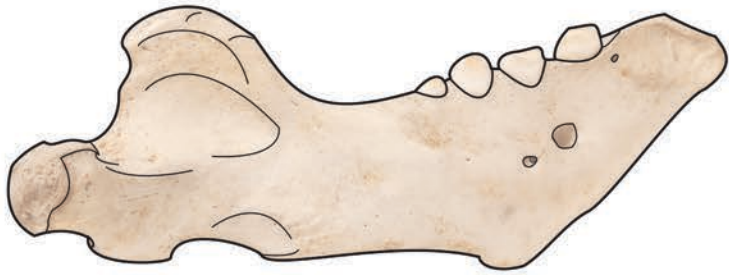

D

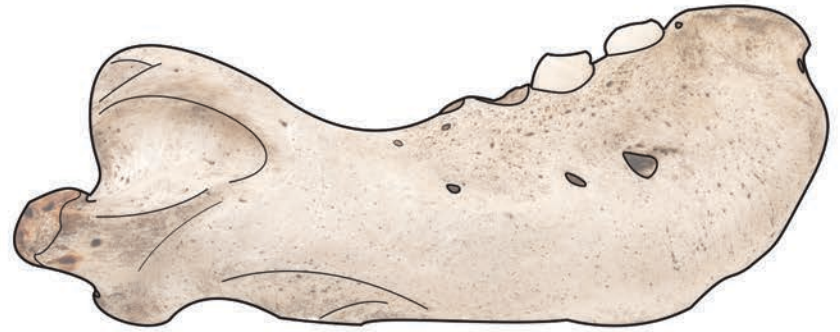

A

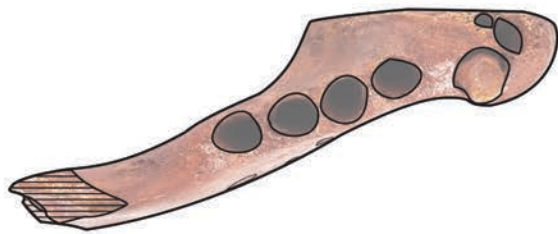

B

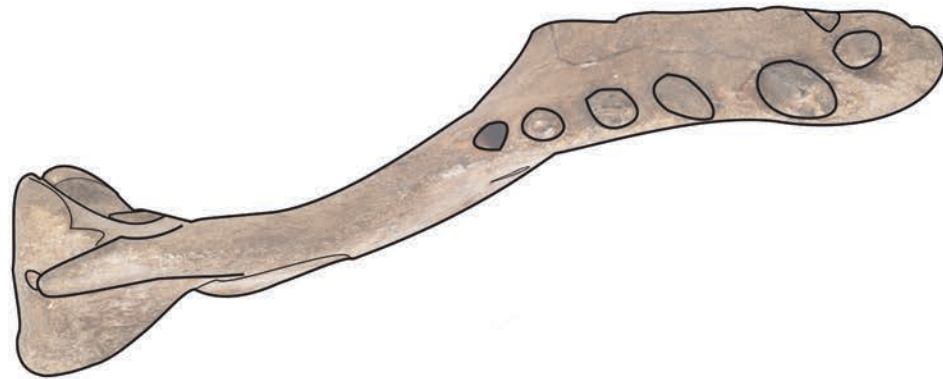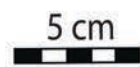

C

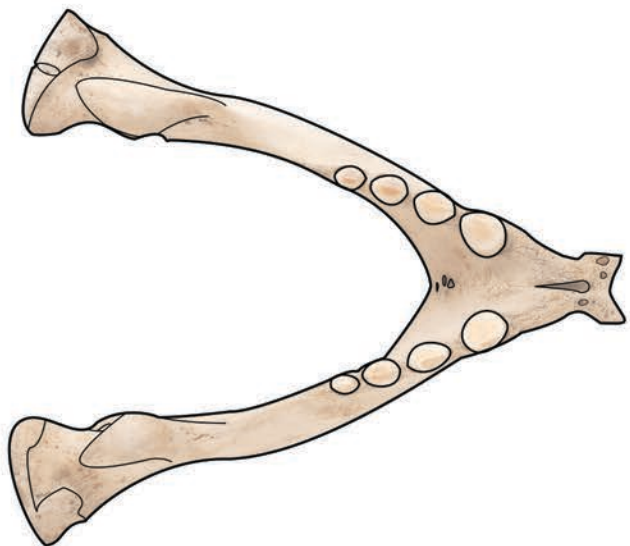

D

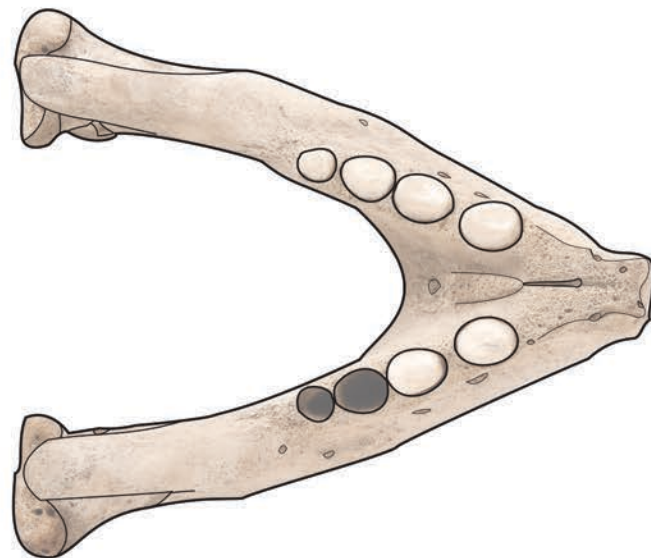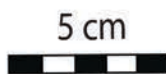

Supplement: FigureS1.pdf [file FigureS1.pdf]
